# Supplementary material for: Inventory Optimization and Management of Health Products and Technologies in Kenya: A Multi-County Study on access to Quality affordable Health Products and Technologies
Source: Research Square preprint supplement (doi:10.21203/rs.3.rs-7250053/v1), 2025-08-11
Supplement: Supplementary file 1 [file 0c88f4856c2b5a34c1f34d43.docx]

**APPENDICES**

**APPENDIX I: INFORMED CONSENT FORM**

**RESEARCH TOPIC: RELATIONSHIP BETWEEN INSTITUTIONAL FACTORS AND MANAGEMENT OF HEALTH PRODUCTS AND TECHNOLOGIES IN SELECTED COUNTIES**

Researcher (Ph.D. Candidate): **Shadrack Meme**

Institution: **Kenya Methodist University, P.O. Box 267-60200, MERU**

1. **Introduction**

This Consent Form offers information regarding the aforementioned research. Read this informed consent form to ensure that you are fully informed about your participation in this research. You will also be asked to sign it, however, even if you sign a consent form, consent will be re-established at the time of the interview. We will provide you with a copy of this form. Some words on this consent form may be new to you. Please let the researcher know if there is anything you do not understand.

1. I……………………………………… voluntarily agree to participate in this research study.
2. I understand that participation involves determining institutional factors influencing the management of eaHealth Products and Technologies (HPT) in advancing universal health coverage.
3. I understand that even if I agree to participate now, I can withdraw at any time or refuse to answer any question without any consequences of any kind.
4. I have had the purpose and nature of the study explained to me in writing and I have had the opportunity to ask questions about the study.
5. I understand that participating in this research will not provide me with any financial or material benefits.
6. I have been assured of no risks associated with participation in this study.
7. I understand that all information I provide for this study will be treated confidentially.
8. I understand my decision to participate or failing to participate will not affect my job.
9. I understand I will not be paid, since participation is wholly voluntary.
10. I understand that I am free to contact any of the people involved in the research to seek further clarification and information or to ask any other question related to the study during your participation.

____________________ ________________________________________

*Signature for the respondent* Date

I certify that the nature and purpose, the potential benefits, and possible risks associated with participating in this research have been explained and understood to the respondent.

____________________ ________________________________________

*Researcher’s signature* *Date*

**APPENDICES**

**APPENDIX II: INTERVIEW SCHEDULE**

**PART A: BACKGROUND INFORMATION**

1. Name of the county (Tick one)
2. Machakos ( )
3. Kiambu
4. Myeri ( )
5. Isiolo ( )
6. Kisumu ( )
7. Name of the facility ……………………………………………………………………………
8. Level of the health facility
9. Level 4 (Sub-County Hospital)
10. Level 5 (County Referral Hospital
11. What is your age in specific years? _____________
12. What is gender
13. Male ( )
14. Female ( )
15. Other ( )
16. What is your level of education completed?
17. Diploma ( )
18. Undergraduate ( )
19. Postgraduate diploma ( )
20. Master degree ( )
21. Ph. D ( )
22. What role do you play in relation to management of health products and technologies?
23. Financing of HPTs
24. Supply chain management for HPTs
25. Inventory management for HPTS
26. Health information management
27. Human resources management
28. Leadership and management
29. How long have you worked in the management of Health Products and Technologies?
30. Less than 1 year ( )
31. 1-5 years ( )
32. 6-10 years ( )
33. 11 years and above ( )

**PART B: STUDY VARIABLES**

**SECTION 1: Health products, technologies financing, and management of Health Products and Technologies**

1. Which factor (s) affect management of HPT in regard to their financing? *(You can tick more than one option)*
2. Amount of budgetary allocation ( )
3. Frequency of funds disbursement ( )
4. Frequency of funds allocation ( )
5. Rate of Budget absorption ( )
6. How often the health facilities receive their budgetary allocation?
7. Yearly ( )
8. Half yearly ( )
9. Quarterly ( )
10. Monthly ( )
11. Never ( )
12. On average, how long does it take to process payment after the receipt of the health products and technologies :
13. Less than 30 days
14. 30- 45 days
15. 45-60 days
16. 60-90 days
17. More than 90 days
18. To what extent do you think timely disbursement of funds affect management of Health products and technologies in your facility?
19. Not at all ( )
20. Small Extent ( )
21. Moderate extent ( )
22. Large Extent ( )
23. Very Large extent ( )
24. Rate the transparency and inclusiveness of the health budgeting process in your organization
25. Very Poor ( )
26. Poor ( )
27. Neutral ( )
28. Good ( )
29. Very Good ( )
30. How effectively are stakeholders involved in the planning and development of the health budget?
31. Not Effectively ( )
32. Slightly Effectively ( )
33. Moderately Effectively ( )
34. Very Effectively ( )
35. Extremely Effectively ( )
36. Indicate your confidence in the accuracy of budget estimates for health products and technologies.
37. Not Confident ( )
38. Slightly Confident ( )
39. Moderately Confident ( )
40. Very Confident ( )
41. Extremely Confident ( )
42. Rate the fairness and appropriateness of budget allocations for health products and technologies.
43. Very Unfair ( )
44. Unfair ( )
45. Neutral ( )
46. Fair ( )
47. Very Fair ( )
48. How well do budget allocations align with the priorities and needs of HPT management?
49. Poorly Aligned ( )
50. Slightly Aligned ( )
51. Moderately Aligned ( )
52. Well Aligned ( )
53. Very Well Aligned ( )
54. Indicate your satisfaction with the level of flexibility in reallocating funds HPT management.
55. Very Dissatisfied ( )
56. Dissatisfied ( )
57. Neutral ( )
58. Satisfied ( )
59. Very Satisfied ( )
60. Rate the efficiency of absorbing allocated budgets for health products and technologies.
61. Very Inefficient ( )
62. Inefficient ( )
63. Neutral ( )
64. Efficient ( )
65. Very Efficient ( )
66. How would you describe the organization's ability to utilize the allocated budget fully?
67. Very Poor ( )
68. Poor ( )
69. Neutral ( )
70. Good ( )
71. Very Good ( )
72. Indicate the factors that may hinder the effective absorption of the budget for health products and technologies.
73. Erratic budget allocation ( )
74. Inefficient Processes ( )
75. Lack of Training ( )
76. Other (Specify) ( )
77. Rate the timeliness and reliability of funds disbursement for health product management.
78. Very Untimely ( )
79. Untimely ( )
80. Neutral ( )
81. Timely ( )
82. Very Timely ( )
83. How well does the disbursement process align with the planned budget timelines?
84. Poor Alignment ( )
85. Slightly Aligned ( )
86. Moderately Aligned ( )
87. Well Aligned ( )
88. Very Well Aligned ( )
89. Indicate your level of satisfaction with the clarity of communication regarding funds disbursement.
90. Very Dissatisfied ( )
91. Dissatisfied ( )
92. Neutral ( )
93. Satisfied ( )
94. Very Satisfied ( )
95. Overall, how satisfied are you with the financial management processes HPT?
96. Very Dissatisfied ( )
97. Dissatisfied ( )
98. Neutral ( )
99. Satisfied ( )
100. Very Satisfied ( )
101. To what extent do you believe improvements in the health financing system could positively impact HPT management?
102. Not at All ( )
103. Small extent ( )
104. Moderate extent ( )
105. Large extent ( )
106. Very large extent ( )
107. **Rate your agreement to the statements relating to financing and management of Health products and technologies in your facility.** *(Use the 5-point Likert scale to tick one response appropriately)*

**(1 -Strongly disagree (SD) 2- Disagree (D) 3- Medium (N) 4-Agree (A) 5-Strongly Agree (SA))**

| **Statements** | 1 | 2 | 3 | 4 | 5 |
| --- | --- | --- | --- | --- | --- |
| The amount of budget allocated for HPTs affects the amount of budget allocated for HPTs |  |  |  |  |  |
| Funds allocated for HPT are spent strictly on procurement and management of HPT |  |  |  |  |  |
| Sources of funding for HPT is reliable and sustainable. |  |  |  |  |  |
| Sustainable financing is a major factor that affects the availability to essential HPT. |  |  |  |  |  |
| Health Financing play universal driving role in improving access to and affordable HPT. |  |  |  |  |  |
| Funds allocated for HPTs are completely absorbed for provision of HPTs for each allocation. |  |  |  |  |  |
| The rate of budgetary absorption for funds allocated for HPTs is crucial aspect in the management of HPTs |  |  |  |  |  |
| There are institutional factors that affect the absorption of budget allocated for HPTs. |  |  |  |  |  |
| Budgeting process for HPTs is participatory and involves stakeholders dealing with the management of HPTs. |  |  |  |  |  |
| Funds allocated for HPTs are released in a timely manner without delays. |  |  |  |  |  |
| The health facility has an outlined annual budget that encompasses all possible resources required in management of HPT |  |  |  |  |  |
| Suppliers for HPT are paid within the agreed terms outlined in the LPO/supply agreement. |  |  |  |  |  |
| The facility experiences frequent stock out of HPTs due to inadequate allocation of finances. |  |  |  |  |  |
| The frequency of budget allocation for HPT is regular and predictable. |  |  |  |  |  |

**SECTION 2: Supply chain practices and management of health products and technologies**

1. Rate how much you agree that supply chain practices affect management of health products and technologies in your facility?
2. Strongly disagree ( )
3. Disagree ( )
4. Medium ( )
5. Agree ( )
6. Strongly Agree ( )
7. To what extent do you think supply chain practices affect availability, affordability and quality of HPTs in your facility?
8. Not at all ( )
9. Small Extent ( )
10. Moderate extent ( )
11. Large Extent ( )
12. Very large extent
13. Which of the following supply chain practices has the **major effect** on management of Health products and technologies? *(You can tick more than one option)*
14. Logistics ( )
15. Procurement processes ( )
16. Availability of drug stores/warehouses ( )
17. Standard Operating Procedures ( )
18. On average, how long does it take to receive all the ordered HPTs after placing the orders with the suppliers
19. Less than 14 days ( )
20. 14-21 days ( )
21. 21- 30 days ( )
22. 30-45 days ( )
23. Over 45 days ( )
24. Who your main supplier of essential health products and technologies in your health facility
25. KEMSA ( )
26. MEDS ( )
27. Others (Specify) ------------------------
28. Who makes procurement decisions in your health facility?
29. Pharmacy in charge ( )
30. Medical officer in charge ( )
31. Health administration officer ( )
32. Procurement officer/Manager ( )
33. Any other (Specify) ------------------
34. How long on average does it take to pay suppliers of HPT in your health facility?
35. Less than 30 days ( )
36. 30- 60 days ( )
37. 60- 90 days ( )
38. 90- 120 days ( )
39. Over 120 ( )
40. **Rate your agreement to the statements relating to supply chain practices and management of Health products and technologies in your facility.** *(Use the 5-point Likert scale to tick one response appropriately)*

**(1 -Strongly disagree (SD) 2- Disagree (D) 3- Medium (N) 4-Agree (A) 5-Strongly Agree (SA))**

| **Statement** | **1** | **2** | **3** | **4** | **5** |
| --- | --- | --- | --- | --- | --- |
| Logistics management affects timely delivery of HPTs to the health facilities. |  |  |  |  |  |
| The organization effectively coordinates the transportation of HPT |  |  |  |  |  |
| Timely delivery of HPT is a priority in our supply chain practices. |  |  |  |  |  |
| The tracking and monitoring of HPT during transportation is efficiently managed. |  |  |  |  |  |
| Procurement processes are streamlined to ensure a steady supply of quality HPT |  |  |  |  |  |
| The organization actively seeks cost-effective procurement methods without compromising quality. |  |  |  |  |  |
| Collaboration with reliable suppliers is a key aspect of our procurement strategy for HPT. |  |  |  |  |  |
| Inventory management systems in place ensure optimal stock levels |  |  |  |  |  |
| The warehouse or drug store facilities are well-organized to facilitate efficient storage and retrieval. |  |  |  |  |  |
| The organization has contingency plans for emergencies affecting warehouse or drug store operations. |  |  |  |  |  |
| Clear and comprehensive SOPs are established for handling HPT |  |  |  |  |  |
| Training programs are in place to ensure staff adherence to established SOPs. |  |  |  |  |  |
| Procurement process for has no effects on the availability and affordability of HPTs. |  |  |  |  |  |
| Continuous improvement initiatives are implemented based on feedback and lessons learned |  |  |  |  |  |
| Timely payment of suppliers affects availability of essential HPTs in the health facility. |  |  |  |  |  |
| The facility has sufficient drug stores (warehouses) for safe storage of HPTs |  |  |  |  |  |
| The Procurement approaches promotes affordability of HPTs used in the facility. |  |  |  |  |  |
| The facility experiences delays in procurement of essential HPTs leading to stock outs. |  |  |  |  |  |
| Standard operating procedures defines the minimum acceptable quality for the HPTs procured by the hospital. |  |  |  |  |  |
| Procurement approaches for HPTs are transparent and encourages the involvement of all stakeholders including the users |  |  |  |  |  |
| Standard operating procedures influences the management of HPT |  |  |  |  |  |
| Procurement of HPT is donefrom prequalified suppliers only. |  |  |  |  |  |
| Management of HPTs is governed by documented standard operating procedures. |  |  |  |  |  |
| Delays in procurement of HPT negatively affect management of HPT |  |  |  |  |  |
| The user departments develop the specifications for the HPTs that meet defined quality threshold in line national standards. |  |  |  |  |  |
| There are adequate storage facilities for the HPT to hold safety stocks. |  |  |  |  |  |

**SECTION 3: Human resource factors and management of Health Products and Technologies**

1. How much do you agree that human resource factors affect management of HPT in your health facility?
2. Strongly disagree ( )
3. Disagree ( )
4. Agree ( )
5. Moderately Agree ( )
6. Strongly Agree ( )
7. Which of the following human resource factors has the **major effect** on management of HPT? *(You can tick more than one option)*
8. Staffing ( )
9. Training ( )
10. Staff distribution ( )
11. Compensation ( )
12. Attitude ( )
13. To what extent would you rate the effectiveness of health workers in-service training onmanagement of HPT in your health facility?
14. Not at all ( )
15. Small Extent ( )
16. Moderate extent ( )
17. Large Extent ( )
18. Very large extent ( )
19. Indicate the frequency of training provided to keep staff updated on advancements in management of HPT.
20. Rarely ( )
21. Occasionally ( )
22. Regularly ( )
23. Frequently ( )
24. Always ( )
25. Rate the overall attitude of staff toward efficient management of HPT.
26. Very Negative ( )
27. Negative ( )
28. Neutral ( )
29. Positive ( )
30. Very Positive ( )
31. Rate the effectiveness of initiatives to foster a positive and proactive attitude among staff.
32. Strongly Disagree ( )
33. Disagree ( )
34. Neutral ( )
35. Agree ( )
36. Strongly Agree ( )
37. Rate the satisfaction with the current compensation structure for staff in HPT.
38. Very Dissatisfied ( )
39. Dissatisfied ( )
40. Neutral ( )
41. Satisfied ( )
42. Very Satisfied ( )
43. Rate the responsiveness in addressing and adjusting deviations from expected outcomes.
44. Very Ineffective ( )
45. Ineffective ( )
46. Neutral ( )
47. Effective ( )
48. Very Effective ( )
49. Rate the effectiveness of addressing challenges in aligning human resources strategies with HPT management goals.
50. Very Ineffective ( )
51. Ineffective ( )
52. Neutral ( )
53. Effective ( )
54. Very Effective ( )
55. Rate the effectiveness of ongoing initiatives or plans for continuous improvement in human resources practices.
56. Very Ineffective ( )
57. Ineffective ( )
58. Neutral ( )
59. Effective ( )
60. Very Effective ( )
61. Rate the effectiveness of communication between the human resources department and those directly involved in HPT management.
62. Very Ineffective ( )
63. Ineffective ( )
64. Neutral ( )
65. Effective ( )
66. Very Effective ( )
67. To what extent is collaboration encouraged for better alignment between staff and HPT management objectives?
68. Not Encouraged ( )
69. Slightly Encouraged ( )
70. Neutral ( )
71. Encouraged ( )
72. Strongly Encouraged ( )
73. To what extent do you think health workers' attitude affects ability to manage HPT?
74. Very Small Extent ( )
75. Small Extent ( )
76. Moderate Extent ( )
77. Large Extent ( )
78. Very Large Extent ( )
79. Rate your agreement to the statements relating to inventory optimization and management of Health products and technologies in your facility**.** *(Use the 5-point Likert scale to tick one response appropriately)*

**(1 -Strongly disagree (SD) 2- Disagree (D) 3- Medium (N) 4-Agree (A) 5-Strongly Agree (SA))**

| **Statement** | 1 | 2 | 3 | 4 | 5 |
| --- | --- | --- | --- | --- | --- |
| The numbers of the staff involved in the management of HPT has no effect on management of HPTs. |  |  |  |  |  |
| There is alignment between staff qualifications/skills and the requirements for HPT management roles. |  |  |  |  |  |
| The training program for staff involved in HPT management are effective. |  |  |  |  |  |
| There is an impact of compensation on employee motivation in managing HPT. |  |  |  |  |  |
| There is an impact of staff distribution on the efficiency of managing HPT |  |  |  |  |  |
| There is effectiveness of staff distribution across different roles within HPT management. |  |  |  |  |  |
| There is efficiency in the recruitment process for roles related to HPT management |  |  |  |  |  |
| Human resources factors play a critical role in promoting access to quality and affordable HPT. |  |  |  |  |  |
| There are effective KPIs to measure influence for human resources performance in HPT management. |  |  |  |  |  |
| Health worker’s attitude is critical in management of HPT |  |  |  |  |  |
| There is an effective feedback mechanism to assess the success of human resource interventions in management of HPT. |  |  |  |  |  |
| There is an integration of staff-related indicators into a cohesive human resources strategy for HPT management. |  |  |  |  |  |
| The staff involved in the management of HPT are sufficiently distributed across various departments |  |  |  |  |  |
| Attitude of staff involved in the management of the HPT affects the management of HPTs |  |  |  |  |  |
| Staff are concerned when essential HPTs are not available when needed by the patients. |  |  |  |  |  |
| Health workers involved in the management of HPT are well appreciated and compensated. |  |  |  |  |  |

**SECTION 4: Inventory optimization and management of Health Products and Technologies**

1. How much do you agree that inventory optimization affect management of HPT in your health facility?

1. Strongly disagree ( )
2. Disagree ( )
3. Medium ( )
4. Agree ( )
5. Strongly Agree ( )
6. Which of the following inventory optimization factors has the major effect on management of HPT*? (You can tick more than one option)*
7. ABC analysis ( )
8. First-Expiry-First- Out ( )
9. Safety stock policy and record keeping ( )
10. Economic order quantity ( )
11. Just in Time ( )
12. To what extent do you think inventory optimizationaffect the management of HPT?
13. Not at all ( )
14. Small Extent ( )
15. Moderate extent ( )
16. Large Extent ( )
17. Very large extent ( )
18. Please rate the frequency of ABC analysis conducted for HPT in your facility.
19. Never ( )
20. Rarely ( )
21. Occasionally ( )
22. Frequently ( )
23. Always ( )
24. Indicate the perceived correlation between ABC analysis and overall inventory efficiency.
25. Very Weak ( )
26. Weak ( )
27. Moderate ( )
28. Strong ( )
29. Very Strong ( )
30. How does adherence to FEFO impact the shelf life and wastage of HPT?
31. Negatively ( )
32. Slightly Negatively ( )
33. Neutral ( )
34. Positively ( )
35. Very Positively ( )
36. Rate the clarity and effectiveness of the criteria used to determine optimal stock levels for HPT.
37. Very Unclear ( )
38. Unclear ( )
39. Neutral ( )
40. Clear ( )
41. Very Clear ( )
42. How frequently is the stocking policy reviewed and adjusted in your facility?
43. Rarely ( )
44. Occasionally ( )
45. Regularly ( )
46. Frequently ( )
47. Always ( )
48. Rate the impact of the stocking policy on product availability and costs in your facility.
49. Negative ( )
50. Slightly Negative ( )
51. Neutral ( )
52. Positive ()
53. Very Positive ( )
54. Please rate the accuracy and reliability of the system used for record-keeping of HPTinventory.
55. Very Inaccurate ( )
56. Inaccurate ( )
57. Neutral ( )
58. Accurate ( )
59. Very Accurate ( )
60. How frequently are historical data and trends utilized in inventory decision-making?
61. Rarely ( )
62. Occasionally ( )
63. Regularly ( )
64. Frequently ( )
65. Always ( )
66. Indicate the observed impact of accurate records on inventory control and financial outcomes.
67. No Impact ( )
68. Slight Impact ( )
69. Neutral ( )
70. Significant Impact ( )
71. Very Significant Impact ( )
72. Rate the integration of ABC analysis, FEFO principle, stocking policy, and record-keeping into a comprehensive inventory management strategy.
73. Very Poorly Integrated ( )
74. Poorly Integrated ( )
75. Neutral ( )
76. Well Integrated ( )
77. Very Well Integrated ( )
78. Indicate the use of specific software or systems to streamline and integrate the management of HPT
79. No Software ( )
80. Basic Software ( )
81. Moderate Software ( )
82. Advanced Software ( )
83. Specialized Software ( )
84. Rate your agreement to the statements relating to inventory optimization and management of Health Products and Technologies in your facility. *(Use the 5-point Likert scale to tick one response appropriately****)***

**(1 -Strongly disagree (SD) 2- Disagree (D) 3- Medium (N) 4-Agree (A) 5-Strongly Agree (SA))**

| **Statement** | 1 | 2 | 3 | 4 | 5 |
| --- | --- | --- | --- | --- | --- |
| Poor inventory management has no effect on the management of HPT |  |  |  |  |  |
| Inventory classifications (A, B, C) influence procurement and stocking decisions. |  |  |  |  |  |
| Replenishment of stock is guided by ABC analysis where category A products are given priority. |  |  |  |  |  |
| First Expiry First Out principle is applied when issuing HPT to the user departments. |  |  |  |  |  |
| The safety stock policy is applied in managing complete stock out of essential HPTs. |  |  |  |  |  |
| Bin cards and other record management tools are used to monitor movement of HPT. |  |  |  |  |  |
| Orders for HPTs are consolidated to achieve desired economic order quantities to promote affordability. |  |  |  |  |  |
| All HPT available in the health facility are stocked based on the institutional policies such as hospital formularies and national essential medicine, medical supplies and diagnostics list. |  |  |  |  |  |
| Stock cycle counts are done to reconcile the physical stock with the data available in the system. |  |  |  |  |  |
| Essential but expensive lifesaving HPTs are ordered and delivered using Just In Time principle as a strategy of inventory holding management. |  |  |  |  |  |
| All new consignments of orders are subjected to full verification before signing of acceptance certificate to ensure the products received meet the defined quality specifications |  |  |  |  |  |
| Stock/bin cards are updated regularly as the primary documents used in monitoring stock of HPTs. |  |  |  |  |  |
| Good Inventory Management in the facility promotes effective management of HPTs thus reducing healthcare costs |  |  |  |  |  |

**SECTION 5: Health management information system and management of Health Products and Technologies**

1. To what extent do you think health management information system affect HPT management in your facility?
2. Not at all ( )
3. Small Extent ( )
4. Moderate extent ( )
5. Large Extent ( )
6. Very large Extent ( )
7. Which of the following health management information systems factors has the major effect on management of HPT*? (You can tick more than one option)*
8. Deployment of HMIS ( )
9. Application/Usage of HMIS ( )
10. ICT infrastructure ( )
11. Data Quality ( )
12. Rate the effectiveness of the deployment process for HMIS in your health facility.
13. Very Ineffective ( )
14. Ineffective ( )
15. Neutral ( )
16. Effective ( )
17. Very Effective ( )
18. How well are users trained on the functionalities of the deployed HMIS?
19. Poor Training ( )
20. Slightly Effective ( )
21. Moderately Effective ( )
22. Very Effective ( )
23. Extremely Effective ( )
24. Indicate the level of user satisfaction with the accessibility and usability of the deployed HMIS.
25. Very Dissatisfied ( )
26. Dissatisfied ( )
27. Neutral ( )
28. Satisfied ( )
29. Very Satisfied ( )
30. Rate the frequency of use of HMIS for managing HPT.
31. Rarely ( )
32. Occasionally ( )
33. Regularly ( )
34. Frequently ( )
35. Always ( )
36. How would you rate the overall efficiency of HMIS in supporting decision-making for HPT management?
37. Very Inefficient ( )
38. Inefficient ( )
39. Neutral ( )
40. Efficient ( )
41. Very Efficient ( )
42. Rate the adequacy and reliability of the ICT infrastructure supporting HMIS in your facility.
43. Very Inadequate ( )
44. Inadequate ( )
45. Neutral ( )
46. Adequate ( )
47. Very Adequate ( )
48. How well does the ICT infrastructure support the integration of HPT HMIS with other health systems?
49. Poorly ( )
50. Slightly ( )
51. Moderately ( )
52. Well ( )
53. Very Well ( )
54. Indicate the extent to which technical issues in the ICT infrastructure impact the usage of HMIS in your facility.
55. Significantly ( )
56. Moderately ( )
57. Slightly ( )
58. Rarely ( )
59. Not at All ( )
60. Rate the accuracy and completeness of data recorded and processed by HMIS in this facility.
61. Very Poor ( )
62. Poor ( )
63. Neutral ( )
64. Good ( )
65. Very Good ( )
66. How often are data quality assessments conducted for HPT within HMIS in this facility?
67. Rarely ( )
68. Occasionally ( )
69. Regularly ( )
70. Frequently ( )
71. Always ( )
72. Indicate the perceived impact of high-quality data on the effectiveness of HPT management.
73. No Impact ( )
74. Slight Impact ( )
75. Neutral ( )
76. Significant Impact ( )
77. Very Significant Impact ( )
78. Overall, how satisfied are you with the contribution of HMIS to HPT management in this facility?
79. Very Dissatisfied ( )
80. Dissatisfied ( )
81. Neutral ( )
82. Satisfied ( )
83. Very Satisfied ( )
84. To what extent do you believe improvements in HMIS can enhance the overall management of health products and technologies?
85. Not at All ( )
86. Slightly ( )
87. Moderately ( )
88. Significantly ( )
89. Extremely ( )
90. To what extent do you think HMISaffect the management of HPT?
91. Not at all ( )
92. Small Extent ( )
93. Moderate extent ( )
94. Large Extent ( )
95. Very large extent ( )
96. Rate your agreement to the statements relating to health management information system and management of Health products and technologies in your facility.*(Use the 5-point Likert scale to tick one response appropriately)*

**(1 -Strongly disagree (SD) 2- Disagree D) 3- Medium (N) 4-Agree (A) 5-Strongly Agree (SA))**

| **Statement** | **1** | **2** | **3** | **4** | **5** |
| --- | --- | --- | --- | --- | --- |
| Health information management system improves accuracy of the data to inform forecasting and quantification of the needed HPT. |  |  |  |  |  |
| Deployment of ICT enhance accurate issuing of the HPT from the stores to the wards. |  |  |  |  |  |
| Health information management system facilitate dispensing pharmacies within the health facility. |  |  |  |  |  |
| Different departments collaborate in using HMIS for HPT management |  |  |  |  |  |
| Health information management system improve availability of HPT by reducing pilferage and losses though expiries. |  |  |  |  |  |
| Availability of ICT infrastructure affect management of HPT. |  |  |  |  |  |
| HMIS is used in the quantification of various commodities that will be needed by a facility for a specific period of time. |  |  |  |  |  |
| Application of HMIS has enhanced management of HPT |  |  |  |  |  |
| Level of ICT literacy support management of HPT |  |  |  |  |  |
| Application of Health information management system plays a role stock replenishment decision for HPTs. |  |  |  |  |  |
| Usage of HMIS help in promoting availability of quality and affordable HPTs. |  |  |  |  |  |
| Data quality affects health accuracy in forecasting of essential HPTs |  |  |  |  |  |
| The hospital has fully adopted the HMIS as means of promoting health commodity security |  |  |  |  |  |
| Usage of Health information management system saves time in the management |  |  |  |  |  |
| Nature of the system applied in the hospital influence how well HPT are managed. |  |  |  |  |  |
| Health information management systems has played an imperative role in improving access to reliable HPT. |  |  |  |  |  |
| Staff working on HPT have sufficient knowledge on usage of HMIS in the management of HPTs. |  |  |  |  |  |

**SECTION 6: Institutional Leadership culture and management of Health Products and Technologies**

1. To what extent do you think Institutional leadership cultureaffect the management of Health products and technologies?
2. Not at all ( )
3. Small Extent ( )
4. Moderate Extent ( )
5. Large Extent ( )
6. Very large extent ( )
7. Which of the following Institutional leadership factors has the major effect on management of Health products and technologies*? (You can tick more than one option)*
8. Communication culture ( )
9. Planning culture ( )
10. Motivation culture ( )
11. Institutional policies ( )
12. Monitoring and Evaluation ( )
13. To what extent do you think institutional leadership culture promotes availability of quality and affordable health products and technologies.?
14. Not at all ( )
15. Small Extent ( )
16. Moderate extent ( )
17. Large Extent ( )
18. Very Large extent ( )
19. Rate your agreement to these statements relating to your institutional leadership culture**. *(use the 5-point Likert scale to circle one response appropriately)***

**1 -Strongly disagree (SA) 2- Disagree (D) 3- Medium (N) 4-Agree (A) 5-Strongly Agree (SD)**

| **Statement** | **1** | **2** | **3** | **4** | **5** |
| --- | --- | --- | --- | --- | --- |
| Leadership promotes a culture of motivation and recognition for individuals and teams involved in HPT management |  |  |  |  |  |
| The leadership demonstrates a commitment to long-term planning for the sustainable management of HPTs |  |  |  |  |  |
| The institution has a well-defined plan for the acquisition and distribution of HPTs. |  |  |  |  |  |
| Planning processes are inclusive, involving key stakeholders in decision-making related to HPT management. |  |  |  |  |  |
| The leadership fosters open and transparent communication within the institution |  |  |  |  |  |
| There is a culture of constructive feedback and information sharing regarding the management of HPT |  |  |  |  |  |
| Information regarding HPT is effectively communicated across different levels of the organization |  |  |  |  |  |
| Institutional quality policy provides clarity on management of HPT |  |  |  |  |  |
| The leadership actively uses feedback from monitoring and evaluations to improve HPT management practices |  |  |  |  |  |
| Regular evaluations are conducted to assess the effectiveness of strategies employed in HPT management |  |  |  |  |  |
| The institution has robust systems in place for monitoring the performance of HPT management. |  |  |  |  |  |
| The institution regularly reviews and updates policies to adapt to changing circumstances in HPT management. |  |  |  |  |  |
| Policies regarding HPT management align with industry best practices and regulatory standards |  |  |  |  |  |
| The institution invests in the professional development of staff involved in HPT management |  |  |  |  |  |
| There are clear incentives in place to encourage effective performance in the management of HPT. |  |  |  |  |  |
| The institution has well-defined policies governing the procurement and utilization of HPT. |  |  |  |  |  |
| There is a clear communication channels among the different stakeholders involved in the management of HPT. |  |  |  |  |  |
| Communication culture influences the management of HPT. |  |  |  |  |  |
| Monitoring and evaluation is critical aspect in establishing effectiveness in the management of HPT. |  |  |  |  |  |
| Planning culture affects availability of quality and affordable HPTs |  |  |  |  |  |

**Section 7. Management of Health Products and Technologies (HPTs) Questionnaire**

**Availability of Health Products and Technologies (HPTs)**

1. Please provide a list of essential Health Products and Technologies (HPTs) commonly used and available in your organization/health facility.
2. How would you rate the overall availability of essential HPTs in your organization/health facility? (Scale: 1-5, where 1 = Poor, 5 = Excellent) 1 2 3 4 5
3. Poor
4. Fair
5. Good
6. Very good
7. Excellent

3. What challenges, if any, do you face in maintaining an adequate supply of HPTs? (Open-ended response) ………………………………………………………………

4. How often do you conduct assessments of HPTs availability to identify and address potential shortages or stock outs? (Select one)

1. Monthly
2. Bi- Monthly
3. Quarterly
4. Annually
5. As needed

**Affordability of Health Products and Technologies (HPTs)**

1. How would you rate the affordability of HPTs for end-users (patients or clients) in your organization/health facility?
2. Very unaffordable ( )
3. Unfordable ( )
4. Moderately affordable ( )
5. Affordable ( )
6. Very Affordable ( )

6. Are there any financial assistance programs or subsidies in place to make HPTs more affordable for end-users? (Yes/No)

a) If yes, please provide details:……………………………….

7. What strategies are implemented to manage and control the cost of HPTs within your organization/health facility? (Open-ended response) ……………………………………...

**Quality of Health Products and Technologies (HPTs)**

8. How would you assess the overall quality of HPTs in your organization/health facility?

1. Poor Quality ( )
2. Fairly good quality ( )
3. Good quality ( )
4. Very good quality ( )
5. Excellent Quality ( )

9. How often are audits or inspections conducted to monitor and improve the quality of HPTs?

1. Regularly
2. Occasionally
3. Rarely
4. Never

10. What quality assurance and control measures are in place to ensure the safety and efficacy of HPTs? (Open-ended response) ……………………………………………………………….

**APPENDIX III: INTERVIEW GUIDE FOR THE KEY INFORMANTS**

***Instructions:* *I would like to ask you some questions on HPT management in your facility. The interview may take 1 hour. Kindly be honest and objective in answering the questions Let us start:***

1. key informant interview guide on the relationship between institutional factors and the management of health products and technologies with the following indicators; financing of health products and technologies, supply chain practices, human resource factors, inventory optimization, health management information system, quality of health products and technologies, affordability and availability of HPTs

**KEY INFORMANT INTERVIEW GUIDE**

Section 1: General Information

1. County Name:
2. Date of Survey:
3. Respondent's Name (Optional):
4. Designation/Role:

**Section 2: Financing for Health Products and Technologies**

1. How is the financing structured for health products and technologies in your county?

a. What sources of funding are available for HPTs?

b. Are there budget allocation mechanisms in place for this sector?

2. What are the financial challenges or constraints in managing health products and technologies in your county?

**Section 3: Supply Chain Practices**

3. Describe the supply chain practices within your institution.

a. How are products and technologies procured?

b. How are products and technologies distributed within the county?

c. Are there any collaboration efforts with external partners in the supply chain?

4. What are the key challenges or bottlenecks in your health product and technology supply chain?

**Section 4: Human Resource Factors**

5. How does your institution address the human resource needs for managing health products and technologies?

a. What is the composition of the workforce involved in this area?

b. Are there specific training programs for staff?

c. How do you ensure staff retention and motivation in this sector?

6. What challenges do you face regarding human resources in the management of health products and technologies?

**Section 2: Inventory Optimization**

7. How does your institution manage inventory for health products and technologies?

a. What inventory management systems are in place?

b. How frequently is inventory reviewed and updated?

c. Are there tools or software used for inventory optimization?

8. What challenges do you face in optimizing health product and technology inventory?

**Section 6: Health Management Information Systems**

9. Explain the health management information systems (HMIS) used in your institution.

a. What data is collected and how is it used for decision-making?

b. Is there integration with broader health information systems?

10. What challenges or limitations do you encounter in implementing and using HMIS for health product and technology management?

**Section 7: Institutional Leadership Culture**

11. Describe the leadership culture within your institution.

a. How does leadership influence decision-making in health product and technology management? b. Are there specific strategies or policies that promote a culture of innovation and excellence in this area?

12. What challenges or opportunities are associated with the institutional leadership culture in managing health products and technologies?

**Section 8: Additional Comments**

13. Briefly describe how management of HPTs can be improved in your Health facilities/ County.

14. Please share any additional comments, suggestions, or concerns related to the management of Health Products and Technologies in your organization/health facility.

Thank you for your participation in this study. Your input is valuable in understanding the institutional factors that impact health product and technology management in Kenyan counties.
